# Supplementary material for: Determinants of Antibody Response to SARS-CoV-2 Vaccines in Liver Transplant Recipients: The Role of Immunosuppression Reduction
Source: MDPI journal article supplement (doi:10.3390/vaccines10111827), 2022-10-29
Supplement: s1 [file s1]

# Supplementary Table S1

Comparison of side effects after first and second SARS-CoV-2 vaccination in all patients

| Side effects       | MRNA MRNA<br>(n=332) | AZ AZ<br>(n=22) | KT KT<br>(n=20) | p value |
|--------------------|----------------------|-----------------|-----------------|---------|
| <b>First dose</b>  |                      |                 |                 |         |
| None               | 165 (49.7)           | 14 (63.6)       | 18 (90)         | 0.001   |
| Local pain         | 142 (42.8)           | 6 (27.3)        | 2 (10)          | 0.007   |
| Fever              | 24 (7.2)             | 2 (9.1)         | 0 (0)           | 0.476   |
| Chills             | 7 (2.1)              | 1 (4.5)         | 0 (0)           | 0.618   |
| Headache           | 8 (2.4)              | 1 (4.5)         | 1 (5)           | 0.312   |
| Malaise            | 14 (4.2)             | 1 (4.5)         | 0 (0)           | 1.000   |
| Myalgia            | 2 (0.6)              | 1 (4.5)         | 0 (0)           | 0.301   |
| Fatigue            | 32 (9.6)             | 2 (9.1)         | 1 (5)           | 0.915   |
| Palpitation        | 4 (1.2)              | 0 (0)           | 0 (0)           | 1.000   |
| Diarrhea           | 3 (0.9)              | 0 (0)           | 1 (5)           | 0.215   |
| Rash/Pruritus      | 3 (0.9)              | 0 (0)           | 0 (0)           | 1.000   |
| Dyspnea            | 2 (0.6)              | 0 (0)           | 0 (0)           | 1.000   |
| <b>Second dose</b> |                      |                 |                 |         |
| None               | 166 (50)             | 13 (59.1)       | 17 (85)         | 0.008   |
| Local pain         | 142 (42.8)           | 7 (31.8)        | 3 (15)          | 0.034   |
| Fever              | 21 (6.3)             | 2 (9.1)         | 0 (0)           | 0.496   |
| Chills             | 7 (2.1)              | 1 (4.5)         | 0 (0)           | 0.618   |
| Headache           | 7 (2.1)              | 1 (4.5)         | 1 (5)           | 0.267   |
| Malaise            | 15 (4.5)             | 2 (9.1)         | 0 (0)           | 0.439   |
| Myalgia            | 4 (1.2)              | 1 (4.5)         | 0 (0)           | 0.451   |
| Fatigue            | 27 (8.1)             | 2 (9.1)         | 2 (10)          | 0.726   |
| Palpitation        | 5 (1.5)              | 0 (0)           | 0 (0)           | 1.000   |
| Diarrhea           | 3 (0.9)              | 0 (0)           | 1 (5)           | 0.215   |
| Rash/Pruritus      | 3 (0.9)              | 0 (0)           | 0 (0)           | 1.000   |
| Dyspnea            | 1 (0.3)              | 0 (0)           | 0 (0)           | 1.000   |
